# Supplementary material for: Development and Clinical Validation of the LymphMonitor Technology to Quantitatively Assess Lymphatic Function
Source: MDPI journal article supplement (doi:10.3390/diagnostics11101873), 2021-10-12
Supplement: s1 [file s1]

## Supplementary Information

### Supplementary Methods:

#### In vitro fluorescence measurements

The fluorescence intensity of ICG-HSA solutions was measured using plate reader (Tecan Infinite M200 Pro, Tecan GmbH) using Costar 96-well, black, flat-bottom plates (Corning Inc.) Briefly, 200  $\mu$ l of the solutions were pipetted into the well and the fluorescence intensity was measured using the following settings:  $\lambda_{ex}/\lambda_{em}$  = 700/750 - 850 nm, gain: 125.

For stability measurements, the fluorescence intensity of the ICG HSA solutions was measured over time for up to 24 h.

### Supplementary Figures

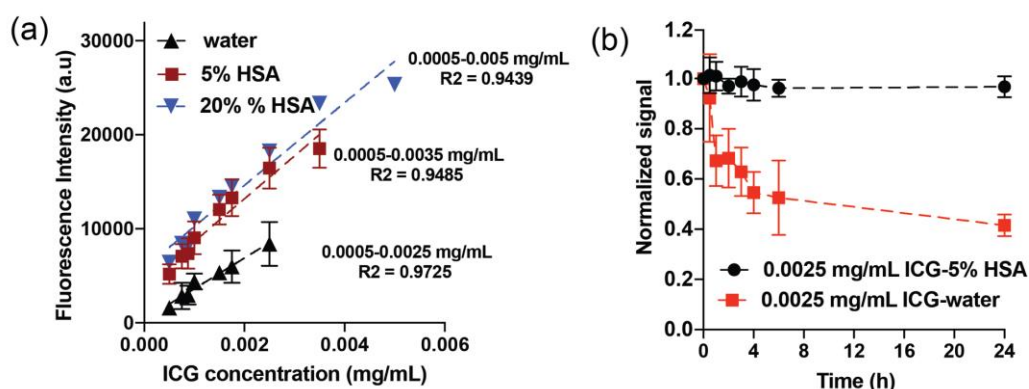

**Figure S1.** (a) Linear relationship between ICG concentrations in purely aqueous solution, 5% and 20% HSA, and fluorescence intensity (Ex/Em: 770 nm/820 nm). The ICG concentration range in which the relationship is linear, and the respective R<sup>2</sup> of the fitted regression lines are shown. (b) Stability of ICG-water and ICG-5% HSA. Fluorescence intensity of the solutions was measured over 24 h.
